# Supplementary material for: Colorectal Cancer Patient‐Derived 2D and 3D Models Efficiently Recapitulate Inter‐ and Intratumoral Heterogeneity
Source: PubMed Central journal article supplement (PMC9353492; doi:10.1002/advs.202201539), 2022-06-02
Supplement: ADVS-9-2201539-s001.pdf [file ADVS-9-2201539-s001.pdf]

## Supporting Information

for *Adv. Sci.*, DOI 10.1002/advs.202201539

Colorectal Cancer Patient-Derived 2D and 3D Models Efficiently Recapitulate Inter- and Intratumoral Heterogeneity

*Yuanyuan Zhao, Bing Zhang, Yiming Ma, Fuqiang Zhao, Jianan Chen, Bingzhi Wang, Hua Jin, Fulai Zhou, Jiawei Guan, Qian Zhao, Hongying Wang, Qian Liu\*, Fangqing Zhao\* and Xia Wang\**

## Supporting Information

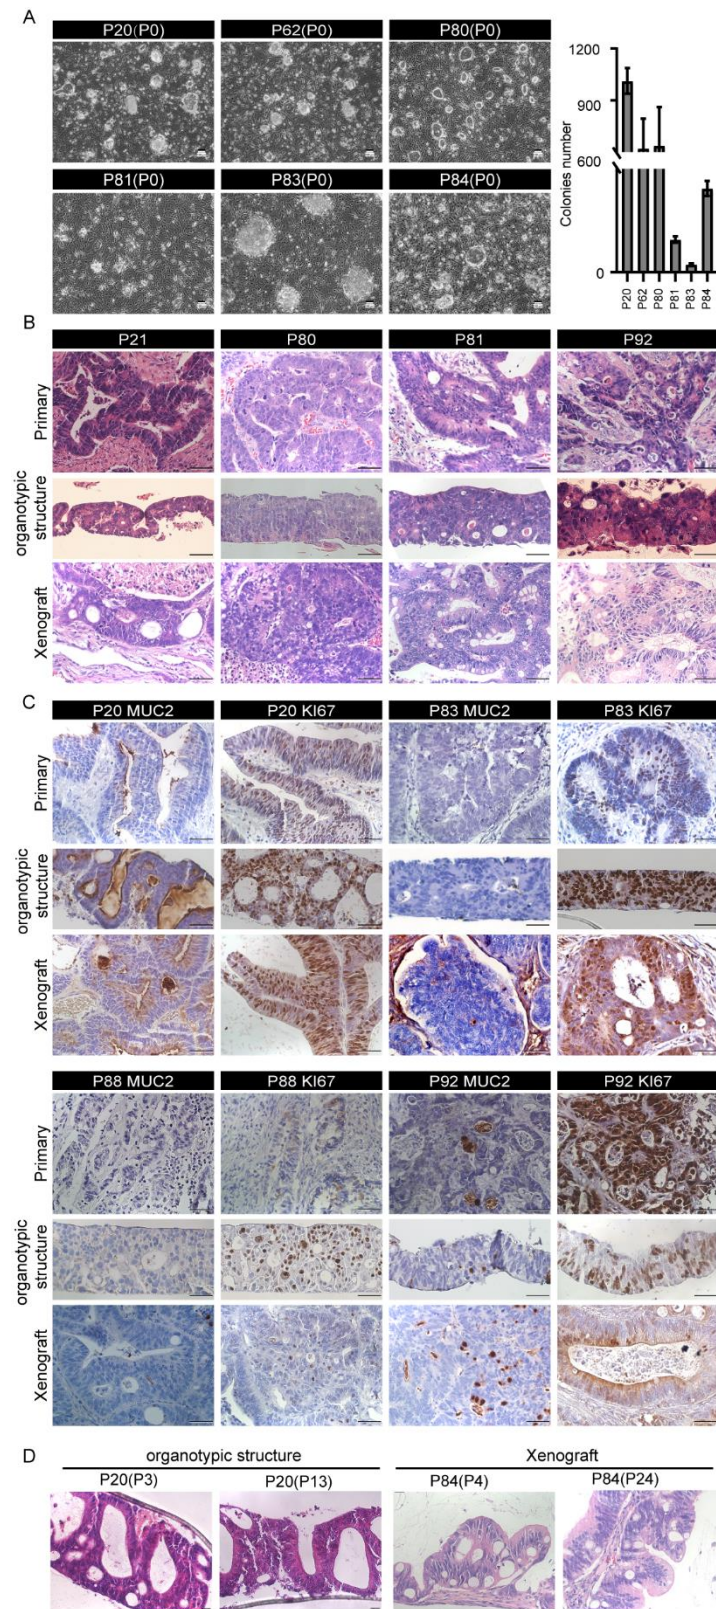

**Figure S1. 3D ALI organotypic cultures and Xenografts Retain Histologic Features of their Parental Tumors, related to Figure 1.**

(A) Brightfield images of PDCC colonies directly derived from colorectal cancer tissues, passage numbers are P0. P0: first culture of the primary tumors. Scale bar, 100  $\mu\text{m}$ . The statistics of the number of colonies are listed on the right.

(B) H&E staining images of four additional representative parental tumors, corresponding 3D ALI organotypic cultures and xenografts. Scale bars, 50  $\mu\text{m}$ .

(C) MUC2 and KI67 IHC staining of representative patient matched parental tumors, ALI organotypic cultures, and xenografts. Scale bar, 50  $\mu\text{m}$ .

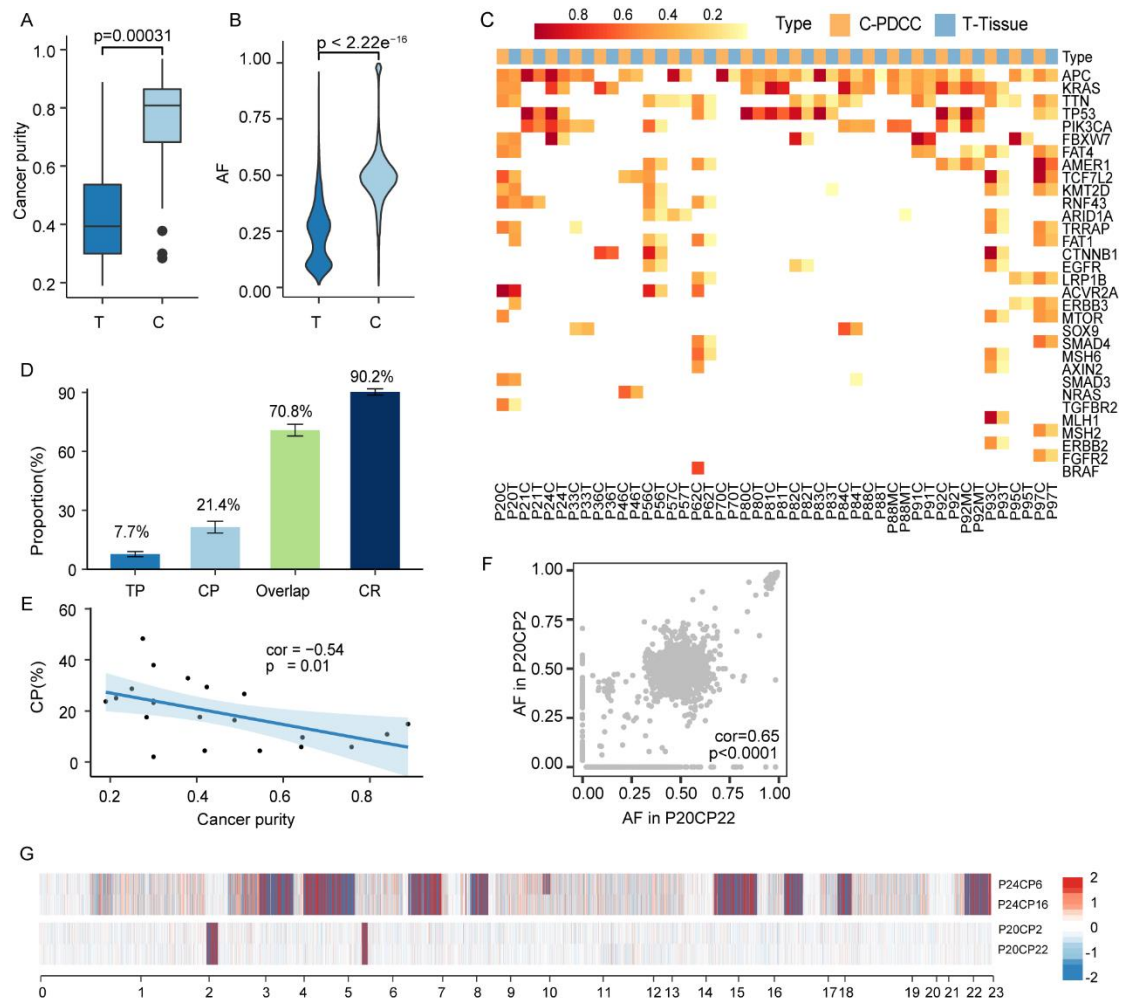

**Figure S2. PDCCs Recapitulate Genomic Alterations of Parental Tumors, related to Figure 3.**

(A) Box-whisker plots showing higher tumor purity in PDCCs than tumor tissues ( $n = 23$ , different patient samples;  $p = 0.00031$ , Wilcox test).

(B) Violin plots showing higher allele frequencies in PDCCs than that in tumor tissues. ( $n = 23$ , different patient samples;  $p < 2.22e-16$ , Wilcox test).

(C) The allele frequencies for driver mutations in PDCCs and corresponding tumor tissues.

(D) Proportion of shared and unique mutations between PDCCs and tissues. The mutation proportion only present in tumor tissues is 7.7% (private SNV of tissue, TP), only present in PDCCs is 21.4% (private SNVs of PDCCs, CP), the overlap in PDCCs and tissues is 70.8%, and the 90.2% mutations detected in tissues are present in the PDCCs (retained SNVs in PDCCs, CR).

(E) The number of private SNVs of PDCCs (CP) is negatively correlated with the tumor purity (Cor = - 0.54;  $p = 0.01$ ). Correlations and  $p$  values are calculated by Pearson's correlation method.

(F) Scatterplot comparing the somatic mutant fraction of SNVs for short-time (passage 2) and long-time culture (passage 22) of P20. Cor = 0.65;  $p < 0.0001$ . Correlations and  $p$  values are calculated by Pearson's correlation method.

(G) Heatmap showing CNAs in short-term cultured PDCCs (passage 6) and long-term cultured PDCCs (passage 16) of P24. Pearson correlation coefficients is 0.96.

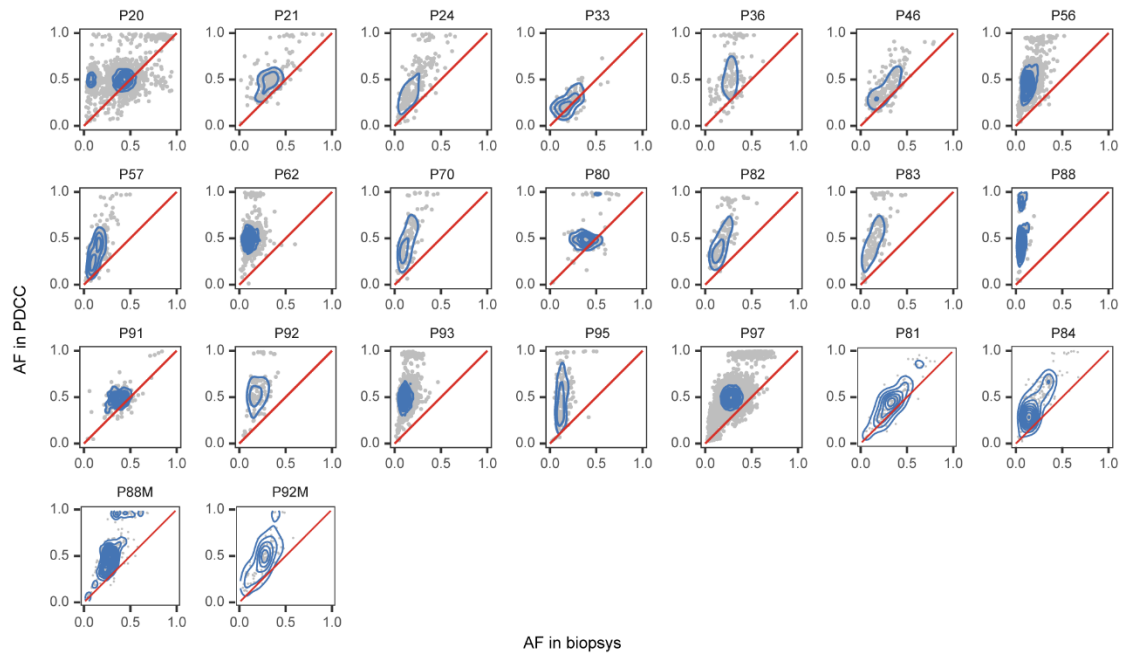

**Figure S3. The correlation of allele frequencies in PDCCs and corresponding tumor tissues, related to Figure 3.**

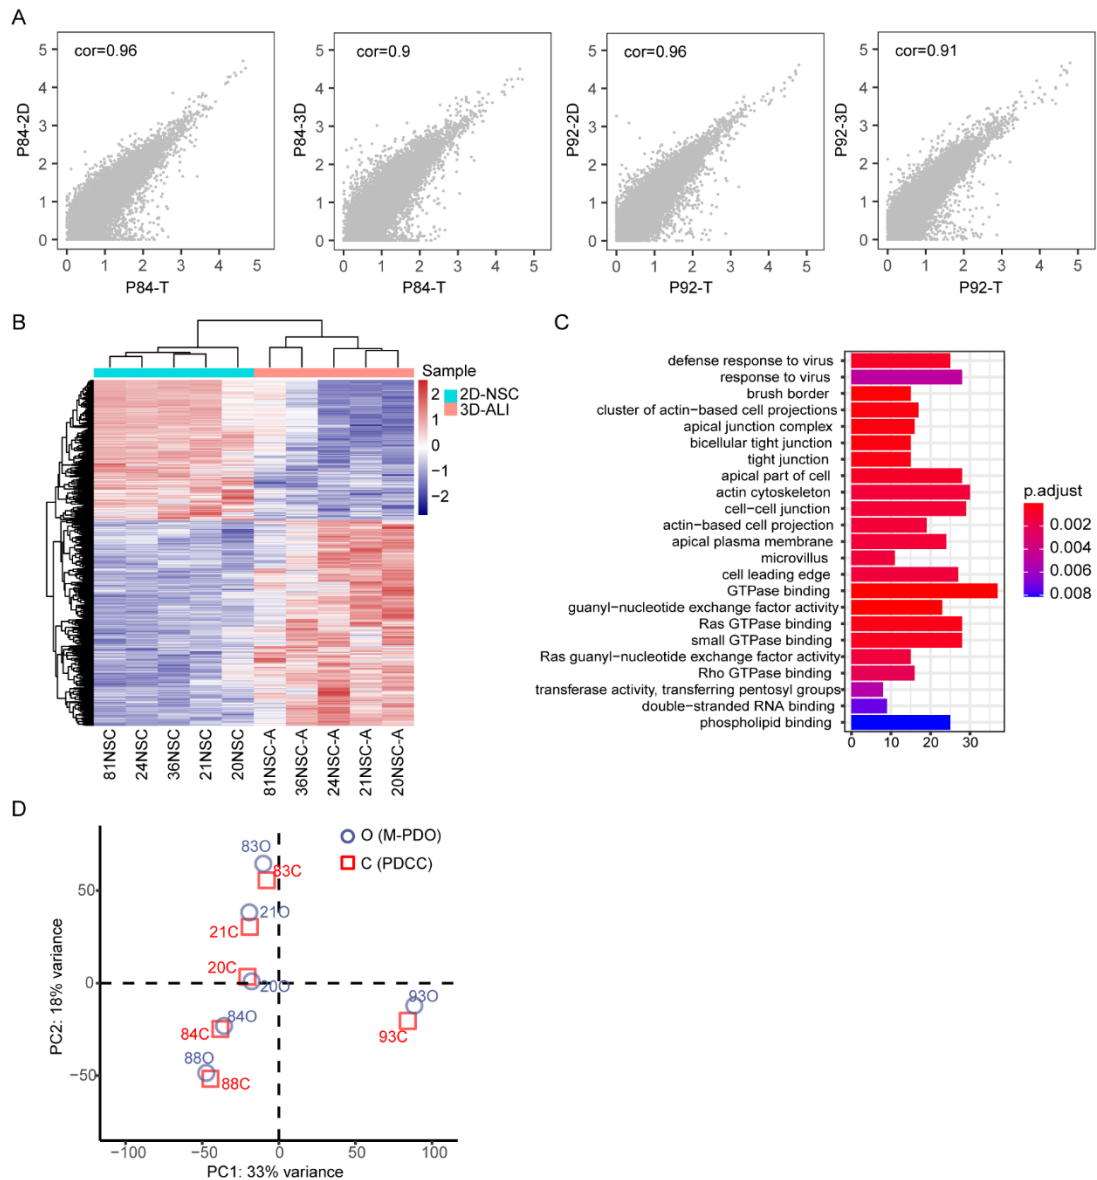

**Figure S4. Transcriptome characteristics in PDCCs and Normal Stem Cells, related to Figure 4.**

(A) Representative scatterplot illustrating the transcriptome correlation between PDCCs and their corresponding tumors (2D vs T), as well as between ALI organotypic cultures and their corresponding tumors (3D vs T). Correlation coefficient was marked in the figure,  $p < 0.0001$ . Correlations and  $p$  values are calculated by Pearson's correlation method.

(B) Heatmap showing the difference between the NSCs and their corresponding ALI

organotypic cultures.

(C) Bar plots of the enriched GO terms of upregulated genes in 3D ALI organotypic cultures compared with 2D NSCs.

(D) PCA shows that PDCCs and their derived spheroids are very close in gene expression. C, PDCCs; O, PDCC derived spheroids.

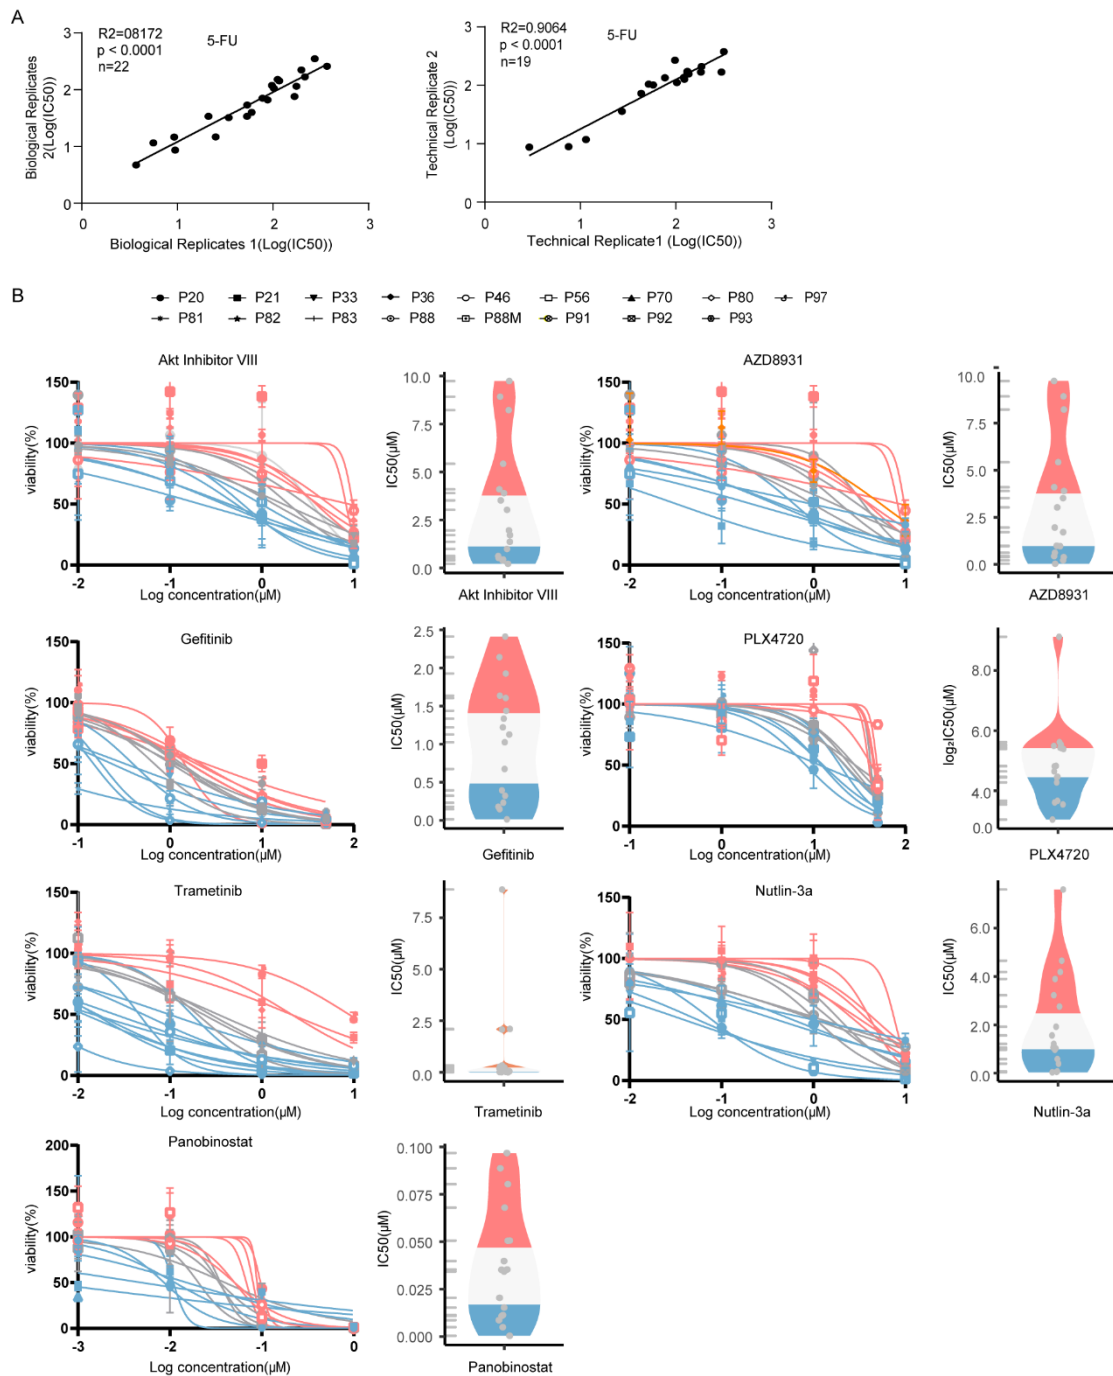

**Figure S5. Drug Response of PDCCs, related to Figure 5.**

(A) Reproducibility of drug response profiles for 5-FU. Plots show correlation between the two biological replicates for each PDCC line using different passages (left,  $n = 22$ ,  $p < 0.0001$ ). Each screen was conducted two times of technical replication (right,  $n = 19$ ,  $p < 0.0001$ ). Each data point represents  $\log(\text{IC}_{50})$ . The  $p$ -values are calculated by two-tailed Student's  $t$ -test.

(B) Dose-response curves of PDCC after six days treatment with seven targeted drugs, respectively. Error bars represent SD of three independent experiments. Violin plots show the distribution of  $\text{IC}_{50}$  values of the drugs in the 17 PDCC lines except PLX4720 which is indicated by  $\log_2(\text{IC}_{50})$ . The blue portion represents the 33% most-sensitive samples, the red portion the 33% most-resistant samples, and the middle portion intermediate drug responses.



Supplementary Information Table 1, Clinicopathological data for 39 colon cancer patients, related to Figure 1.

| Patient sample | Source | Sex | Age | Pre-treatment | Stage | metastases | Histology grade          | Normal counter part | 2D-PDCC culture | ALI-PDO culture | M-PDO culture | Subcutaneous tumor | WES | PDC RNA-Seq | ALI-PDO RNA-Seq | Subtype Biopsy | Subtype 2D PDCC | Subtype ALI-PDO | Passage ratio |
|----------------|--------|-----|-----|---------------|-------|------------|--------------------------|---------------------|-----------------|-----------------|---------------|--------------------|-----|-------------|-----------------|----------------|-----------------|-----------------|---------------|
| P20            | E      | M   | 47  | N             | III   | -          | mod/poorly               | +                   | +               | +               | +             | +                  | +   | +           | +               | Goblet.like    | Goblet like     | Goblet like     | 1:200         |
| P21            | E      | M   | 66  | N             | III   | -          | well/mod diff            | +                   | +               | +               | +             | +                  | +   | +           | +               |                | TA like         | TA like         | 1:50          |
| P24            | E      | M   | 66  | Y             | IV    | -          | mod diff                 | +                   | +               | +               | N/T           | +                  | +   | +           | +               |                | TA like         | TA like         | 1:100         |
| P33            | E      | M   | 49  | N             | III   | -          | mod diff                 | +                   | +               | +               | N/T           | +                  | +   | +           | +               | Enterocyte     | Stem like       | Goblet like     | 1:4           |
| P34            | E      | F   | 84  | N             | II    | -          | mod diff                 | N/T                 | -               |                 |               |                    |     |             |                 |                |                 |                 |               |
| P35            | E      | M   | 67  | N             | III   | -          | mod diff                 | N/T                 | -               |                 |               |                    |     |             |                 |                |                 |                 |               |
| P36            | E      | F   | 67  | N             | IV    | -          | mod/poorly               | +                   | +               | +               | N/T           | +                  | +   | +           | +               | Goblet.like    | Goblet like     | Goblet like     | 1:4           |
| P44            | E      | M   | 55  | N             | IV    | +          | poorly diff              | N/T                 | -               |                 |               |                    |     |             |                 |                |                 |                 |               |
| P45            | E      | F   | 63  | N             | IIIb  | +          | poorly diff              | N/T                 | -               |                 |               |                    |     |             |                 |                |                 |                 |               |
| P46            | E      | M   | 43  | N             | III   | -          | mod diff                 | +                   | +               | N/T             | N/T           | N/T                | +   | +           | N/T             | TA             | TA like         |                 | 1:10          |
| P53            | E      | M   | 76  | N             | IV    | -          | mod/poorly               | +                   | +               | N/T             | N/T           | N/T                | N/T | N/T         | N/T             | Enterocyte     |                 |                 | 1:6           |
| P54            | E      | F   | 74  | N             | IV    | -          | mod/poorly               | N/T                 | +               | N/T             | N/T           | N/T                | N/T | N/T         | N/T             |                |                 |                 | 1:6           |
| P56            | E      | M   | 65  | N             | III   | -          | mod diff                 | +                   | +               | +               | N/T           | N/T                | +   | +           | +               | Enterocyte     | TA like         | TA like         | 1:10          |
| P57            | E      | M   | 60  | Y             | IV    | +          | mod/poorly               | N/T                 | +               | N/T             | N/T           | +                  | +   | +           | N/T             | Enterocyte     | TA like         | TA like         | 1:6           |
| P61            | E      | M   | 82  | N             | II    | -          | mod diff                 | N/T                 | -               |                 |               |                    |     |             |                 |                |                 |                 |               |
| P62            | E      | F   | 64  | N             | III   | -          | mod diff                 | +                   | +               | +               | +             | +                  | +   | +           | +               | Goblet.like    | Goblet like     | Goblet like     | 1:100         |
| P70            | E      | M   | 62  | N             | II    | -          | mod/poorly               | +                   | +               | +               | N/T           | +                  | +   | +           | N/T             | Enterocyte     | TA like         |                 | 1:6           |
| P71            | E      | M   | 70  | N             | IV    | -          | mod/poorly               | N/T                 | -               |                 |               |                    |     |             |                 |                |                 |                 |               |
| P74            | E      | M   | 75  | Y             | III   | -          | mod/poorly               | N/T                 | +               | N/T             | N/T           | N/T                | N/T | N/T         | N/T             |                |                 |                 |               |
| P76            | E      | M   | 57  | N             | III   | -          | mod/poorly               | N/T                 | +               | N/T             | N/T           | N/T                | N/T | N/T         | N/T             |                |                 |                 |               |
| P80            | E      | M   | 62  | N             | III   | -          | mod/poorly               | +                   | +               | +               | N/T           | +                  | +   | +           | +               |                | TA like         | TA like         | 1:6           |
| P81            | E      | F   | 47  | N             | II    | -          | mod/poorly               | +                   | +               | +               | N/T           | +                  | +   | +           | +               | Goblet.like    | TA like         | TA like         | 1:7           |
| P82            | E      | M   | 72  | N             | III   | -          | mod diff                 | +                   | +               | +               | N/T           | Not fo             | +   | +           | N/T             |                | TA like         |                 | 1:7           |
| P83            | E      | M   | 78  | Y             | IV    | +          | poorly diff              | +                   | +               | +               | +             | +                  | +   | +           | +               |                | TA like         | TA like         | 1:10          |
| P84            | E      | M   | 66  | N             | III   | -          | mod diff                 | +                   | +               | +               | +             | +                  | +   | +           | +               | Goblet.like    | Goblet like     | Goblet like     | 1:10          |
| P86            | E      | M   | 70  | Y             | II    | +          | mod/poorly               | N/T                 | -               |                 |               |                    |     |             |                 |                |                 |                 |               |
| P87            | E      | M   | 65  | N             | III   | +          | mod/poorly               | N/T                 | +               | N/T             | N/T           | N/T                | N/T | N/T         | N/T             |                |                 |                 |               |
| P88            | E      | M   | 61  | N             | IV    | +          | mod/poorly<br>mod/poorly | +                   | +               | +               | +             | +                  | +   | +           | +               | Enterocyte     | TA like         | Goblet like     | 1:20          |
| P88M           | E      | M   | 61  | N             | IV    | +          | diff                     | +                   | +               | +               | N/T           | +                  | +   | +           | +               | Inflammatc     | Goblet like     | Goblet like     | 1:50          |
| P90            | E      | M   | 70  | Y             | II    | -          | mod diff                 | N/T                 | +               | N/T             | N/T           | N/T                | N/T | N/T         | N/T             |                |                 |                 |               |

|      |   |   |    |   |     |   |             |     |   |     |     |        |     |     |     |             |             |         |       |
|------|---|---|----|---|-----|---|-------------|-----|---|-----|-----|--------|-----|-----|-----|-------------|-------------|---------|-------|
| P91  | E | M | 79 | Y | III | - | mod diff    | +   | + | +   | N/T | Not fo | +   | +   | N/T | Goblet.like | Goblet like | 1:10    |       |
| P92  | E | M | 75 | N | IV  | + | mod diff    | +   | + | +   | +   | +      | +   | +   | N/T |             | TA like     | 1:6     |       |
| P92M | E | M | 75 | N | IV  | + | mod diff    | +   | + | +   | N/T | N/T    | +   | +   | +   | TA          | TA like     | TA like | 1:10  |
| P93  | E | F | 51 | Y | IV  | + | poorly diff | +   | + | +   | N/T | +      | +   | +   | +   | Enterocyte  | TA like     | TA like | 1:40  |
| P94  | E | M | 66 | Y | III | + | mod/poorly  | N/T | - |     |     |        |     |     |     |             |             |         |       |
| P95  | E | M | 71 | Y | III | + | mod/poorly  | N/T | + | +   | N/T | N/T    | +   | +   | +   | Enterocyte  | TA like     | TA like | 1:20  |
| P96  | E | M | 58 | Y | I   | - | mod/poorly  | N/T | + | N/T | N/T | N/T    | N/T | N/T | N/T |             |             |         |       |
| P97  | E | M | 51 | Y | IV  | - | poorly diff | +   | + | +   |     | +      | +   | +   | +   |             | TA like     | TA like | 1:100 |
| P98  | E | F | 66 | Y | III | + | poorly diff | N/T | - |     |     |        |     |     |     |             |             |         |       |

E: Surgical excision

N/T: Not Test

Supplementary Information Table 2, Tumor formation in mice, related to Figure 1

| PDCCs | Cell injected   | engraftment            | xenograft | days reached to 500mm |
|-------|-----------------|------------------------|-----------|-----------------------|
| P20   | 10 <sup>6</sup> | subcutaneous injection | 5/5       | 19                    |
| P21   | 10 <sup>6</sup> | subcutaneous injection | 5/5       | 22                    |
| P24   | 10 <sup>6</sup> | subcutaneous injection | 5/5       | 21                    |
| P33   | 10 <sup>6</sup> | subcutaneous injection | 5/5       | >90                   |
| P36   | 10 <sup>6</sup> | subcutaneous injection | 3/6       | >90                   |
| P57   | 10 <sup>6</sup> | subcutaneous injection | 5/5       | 69                    |
| P62   | 10 <sup>6</sup> | subcutaneous injection | 5/5       | 22                    |
| P70   | 10 <sup>6</sup> | subcutaneous injection | 5/5       | 36                    |
| P80   | 10 <sup>6</sup> | subcutaneous injection | 5/5       | >93                   |
| P83   | 10 <sup>6</sup> | subcutaneous injection | 5/5       | >53                   |
| P84   | 10 <sup>6</sup> | subcutaneous injection | 5/5       | 47                    |
| P88M  | 10 <sup>6</sup> | subcutaneous injection | 5/5       | 15                    |
| P92   | 10 <sup>6</sup> | subcutaneous injection | 5/5       | 74                    |
| P93   | 10 <sup>6</sup> | subcutaneous injection | 5/5       | 40                    |
| P97   | 10 <sup>6</sup> | subcutaneous injection | 5/5       | 19                    |

Supplementary Information Table 3, Geno Ontology (GO) functional enrichment analysis

| ID       | Description                            | GeneRatio | BgRatio  | p.adjust | qvalue   |
|----------|----------------------------------------|-----------|----------|----------|----------|
| hsa04010 | MAPK signaling pathway                 | 11/95     | 294/8102 | 0.020147 | 0.016121 |
| hsa04014 | Ras signaling pathway                  | 10/95     | 232/8102 | 0.020147 | 0.016121 |
| hsa04015 | Rap1 signaling pathway                 | 10/95     | 210/8102 | 0.0134   | 0.010723 |
| hsa04060 | Cytokine-cytokine receptor interaction | 10/95     | 295/8102 | 0.042346 | 0.033885 |
| hsa04218 | Cellular senescence                    | 8/95      | 156/8102 | 0.020147 | 0.016121 |
| hsa04350 | TGF-beta signaling pathway             | 10/187    | 94/8102  | 0.015107 | 0.014408 |
| hsa04915 | Estrogen signaling pathway             | 7/95      | 138/8102 | 0.026701 | 0.021366 |
| hsa05142 | Chagas disease                         | 7/95      | 102/8102 | 0.0134   | 0.010723 |
| hsa05146 | Amoebiasis                             | 6/95      | 102/8102 | 0.026701 | 0.021366 |
| hsa05205 | Proteoglycans in cancer                | 9/95      | 205/8102 | 0.020147 | 0.016121 |
| hsa05219 | Bladder cancer                         | 6/187     | 41/8102  | 0.042592 | 0.04062  |
| hsa05224 | Breast cancer                          | 7/95      | 147/8102 | 0.032874 | 0.026306 |
| hsa05226 | Gastric cancer                         | 9/95      | 149/8102 | 0.01277  | 0.010218 |
